# Supplementary material for: Cryo-EM structure-based selection of computed ligand poses enables design of MTA-synergic PRMT5 inhibitors of better potency
Source: PubMed Central journal article supplement (PMC9530242; doi:10.1038/s42003-022-03991-9), 2022-10-03
Supplement: 42003_2022_3991_MOESM4_ESM.pdf [file 42003_2022_3991_MOESM4_ESM.pdf]

In accordance with Springer Nature Authorship Policy we agree to change the authors of the manuscript as indicated below.

NAME OF JOURNAL: \_\_\_\_\_

TITLE OF MANUSCRIPT: \_\_\_\_\_

MANUSCRIPT NUMBER: \_\_\_\_\_

CORRESPONDING AUTHORS NAME: \_\_\_\_\_

PREVIOUS AUTHOR NAMES:

|  |
|--|
|  |
|--|

UPDATED AUTHOR NAMES:

|  |
|--|
|  |
|--|

CHANGE TO AUTHOR LIST:

|  |
|--|
|  |
|--|

| Print Name | Signature                                                                           | Date       |
|------------|-------------------------------------------------------------------------------------|------------|
|            |  | 9/9/2022   |
|            |  | 09/09/2022 |
|            |  | 09/09/2022 |
|            | Chenglong Li                                                                        | 9/9/2022   |
|            |  |            |
|            |                                                                                     |            |
|            |                                                                                     |            |
|            |                                                                                     |            |
